# Supplementary material
Source: PubMed Central journal article supplement (PMC4195787)
Supplement: embj0033-1928-sd2.pdf [file embj0033-1928-sd2.pdf]

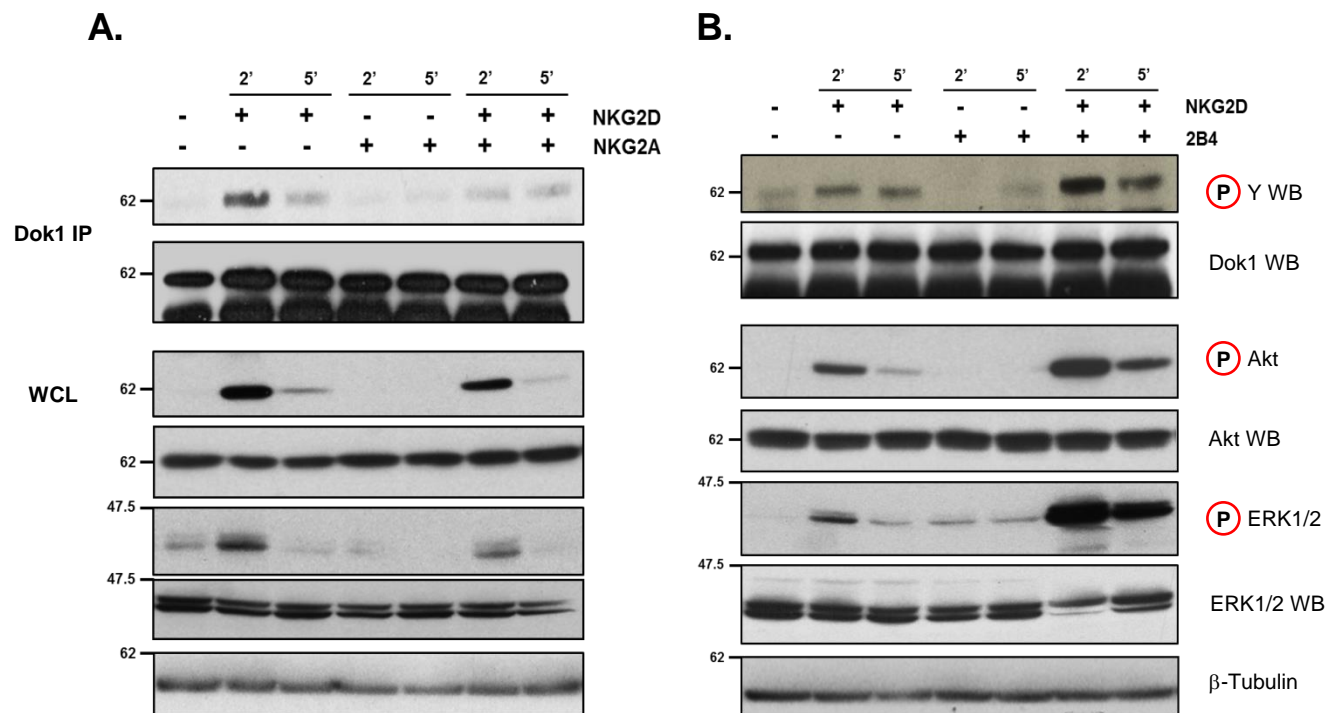

**NKG2D stimulation induces Dok-1 tyrosine phosphorylation in NKL cell line.** IL-2-starved for at least 18h, NKL cells were incubated with anti-NKG2D alone or in combination with either anti-NKG2A (A) or anti- 2B4 (B) Abs and then stimulated by cross-linking with goat-anti-mouse F(ab')<sub>2</sub> at 37°C for indicated times. After stimulation, NKL cells were lysed and lysates were immunoprecipitated with an anti-Dok-1 Ab, resolved on SDS-PAGE and immunoblotted for anti-phosphotyrosine mAb (clone 4G10). A fraction from WCL was immunoblotted for phospho-S473-Akt and phospho-ERK1/2 and then reprobed for total AKT and ERK1/2. Immunoblot anti- $\beta$ -tubulin served also as sample-loading control. This experiment is representative of three independent experiments.
