# Supplementary material
Source: PubMed Central journal article supplement (PMC4195787)
Supplement: embj0033-1928-sd3.pdf [file embj0033-1928-sd3.pdf]

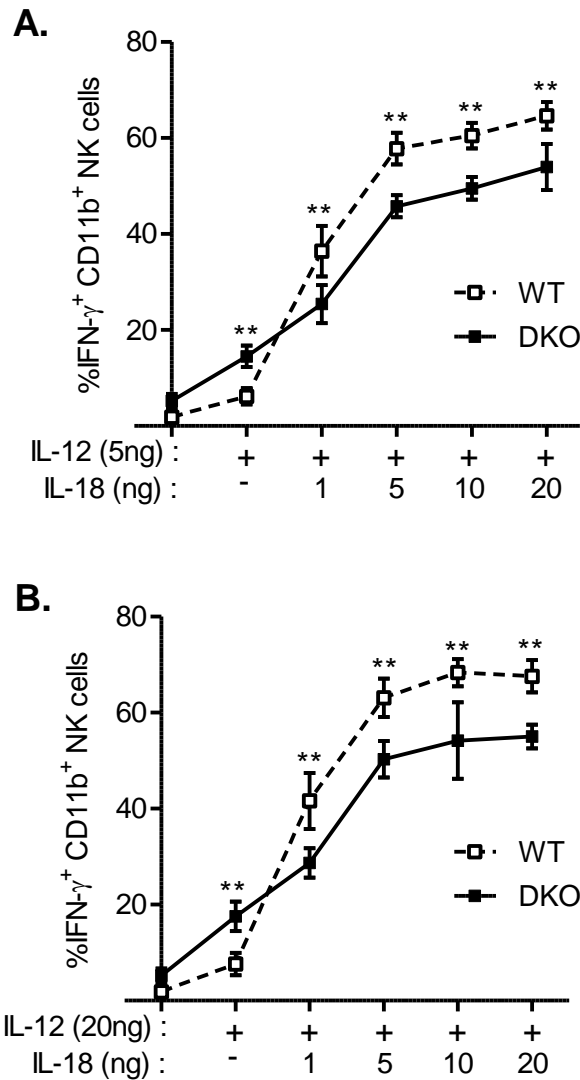

### Dose effect of cytokines on IFN- $\gamma$ production in Dok-1/Dok-2 – deficient NK cells.

Splenocytes from WT or DKO mice were *in vitro* stimulated with either only IL-12 at indicated concentrations or IL-12 plus IL-18 at increasing doses for 4h to 37°C in presence of brefeldin A. At the end of stimulation, cells were starved and extracellular stained for CD3, NKp46, DX5 and CD11b markers followed by fixation/permeabilisation and intracellular staining for IFN- $\gamma$ . Data representative of 2 independent experiments (n=6-7 mice of each group), \*\* p<0.01.
