# Supplementary material
Source: PubMed Central journal article supplement (PMC4195787)
Supplement: embj0033-1928-sd6.pdf [file embj0033-1928-sd6.pdf]

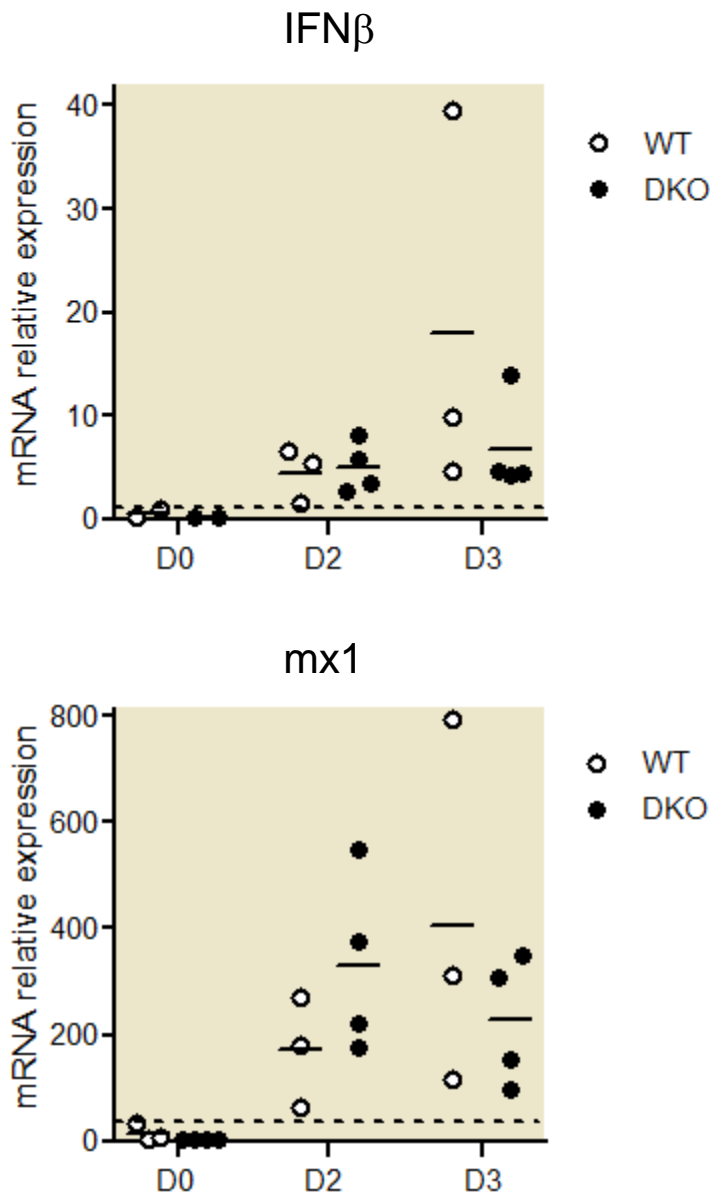

### Relative expression of IFN $\beta$ and Mx1 in wild type and Dok1/Dok2-deficient mice during MCMV infection:

As described in figure 7 WT and DKO mice were challenged with  $\Delta$ m152-Rae1y MCMV.

Relative expression of IFN $\beta$  (upper panel) and Mx1 (lower panel) was evaluated in spleen from WT (**white circles**) or DKO (**black circles**) mice before (**D0**) and 2 or 3 days post-infection (**D2** and **D3**) by qRT-PCR. The horizontal bars represent mean values.
