# Supplementary material
Source: PubMed Central journal article supplement (PMC4195787)
Supplement: embj0033-1928-sd7.pdf [file embj0033-1928-sd7.pdf]

## **Supplementary references.**

### **Supplemental Figure 1:**

**Crozat K**, Guiton R, Contreras V et al. The XC chemokine receptor 1 is a conserved selective marker of mammalian cells homologous to mouse CD8alpha+ dendritic. *J Exp Med.* 2010; 207(6):1283-1292.

**Lindstedt M**, Lundberg K, Borrebaeck CA. Gene family clustering identifies functionally associated subsets of human in vivo blood and tonsillar dendritic cells. *J Immunol.* 2005; 175(8):4839-4846.

**Du X**, Tang Y, Xu H et al. Genomic profiles for human peripheral blood T cells, B cells, natural killer cells, monocytes, and polymorphonuclear cells: comparisons to ischemic stroke, migraine, and Tourette syndrome. *Genomics.* 2006; 87(6):693-703.

**Robbins SH**, Walzer T, Dembélé D et al. Novel insights into the relationships between dendritic cell subsets in human and mouse revealed by genome-wide expression profiling. *Genome Biol.* 2008; 9(1):R17.

**Grimm J**, Sachs M, Britsch S et al. Novel p62dok family members, dok-4 and dok-5, are substrates of the c-Ret receptor tyrosine kinase and mediate neuronal differentiation. *J Cell Biol.* 2001;154(2):345-54.

**Favre C**, Gérard A, Clauzier E, Pontarotti P, Olive D, Nunès JA. DOK4 and DOK5: new Dok-related genes expressed in human T cells. *Genes Immun.* 2003; 4(1):40-5.

### **Supplemental Figure 4:**

**Firaguay G**, Nunès JA. Analysis of signaling events by dynamic phosphoflow cytometry. *Sci Signal.* 2009; 2(86): p13.
